# Supplementary material for: Enhancing σ/π-type copper(i)⋯thiophene interactions by metal doping (metal = Li, Na, K, Ca, Sc)
Source: Royal Society of Chemistry journal article supplement (doi:10.1039/c4dt02286f), 2014-10-15
Supplement: c4dt02286f1.pdf [file c4dt02286f1.pdf]

*Electronic Supplementary Material (ESI) for Dalton Transactions*

*This journal is © The Royal Society of Chemistry*

## Enhancing $\sigma/\pi$ -type Copper(I)···thiophene Interactions by Metal Doping (Metal = Li, Na, K, Ca, Sc)

Xiayan Zhang, Xiaoyan Li\*, Yanli Zeng, Shijun Zheng, Lingpeng Meng\*

Institute of Computational Quantum Chemistry, College of Chemistry and Material Science, Hebei Normal University, Shijiazhuang 050024, PR China

### Table of contents:

**Table S1** Calculated interaction energies and BSSE energies of  $\pi$ -type  $C_4H_4S\cdots CuX$  and  $MC_4H_4S\cdots CuX$  (M = Li, Na, K; X = F, Cl, Br) at different levels

**Table S2** NBO bond orbital coefficients of  $\pi$ -type Ca/Sc doped complexes.

**Table S3** Topological properties at the BCPs of  $Cu\cdots S$  in  $\sigma$ -type  $C_4H_4S\cdots CuX$  and  $MC_4H_4S\cdots CuX$  (M = Li, Na, K, Ca, Sc; X = F, Cl, Br) (all values in a. u.)

**Table S4** Atomic net charge on different regions of  $\sigma$ -type  $C_4H_4S\cdots CuX$  and  $MC_4H_4S\cdots CuX$  (M = Li, Na, K, Ca, Sc; X = F, Cl, Br)

**Figure S1** Linear relationships between interaction energy ( $\Delta E$ ) and the bond length changes of  $Cu\cdots X$  bonding ( $\Delta d(Cu-X)$ ) in  $\sigma$ -type complexes.

**Figure S2** Molecule graphs of electron density of  $\sigma$ -type  $C_4H_4S\cdots CuX$ (a) and  $MC_4H_4S\cdots CuX$ (b) (M = Li, Na, K, Ca, Sc; X = F, Cl, Br).

**Figure S3** Linear relationships between topological properties at the BCPs and the bond lengths  $d(Cu\cdots S)$  of  $Cu\cdots S$  bonding in  $\sigma$ -type  $MC_4H_4S\cdots CuX$  (M = Li, Na, K, Ca, Sc; X = F, Cl, Br). (a) Electron density  $\rho(r_c)$  and the bond lengths, (b) Electron density Laplacian  $\nabla^2\rho(r_c)$  and the bond lengths, (c) Delocalization index  $\delta(A, B)$  and the bond lengths, (d) Total energy density  $H_c$  and the bond lengths.

**Figure S4** Two-dimensional (2D) cross sections ELF through the  $\sigma$ -type  $MC_4H_4S\cdots CuX$  (M = Li, Na, K, Ca, Sc; X = F, Cl, Br).

**Figure S5** The molecular formation density difference of  $\sigma$ -type  $MC_4H_4S\cdots CuX$ (brown is negative, purple is positive and the isosurface is 0.001).

**Table S1** Calculated interaction energies and BSSE energies of  $\pi$ -type  $C_4H_4S \cdots CuX$  and  $MC_4H_4S \cdots CuX$  (M = Li, Na, K; X = F, Cl, Br) at different levels

|                                                 | MP2/6-311+G(2df) | CCSD/6-311+G(2df) | wB97xd/6-311+G(2df) | wb97xd/aug-cc-pVDZ |
|-------------------------------------------------|------------------|-------------------|---------------------|--------------------|
| LiC <sub>4</sub> H <sub>4</sub> S $\cdots$ CuF  | -169.9(22.7)     | -135.6(4.6)       | -138.9(5.1)         | -152.7             |
| LiC <sub>4</sub> H <sub>4</sub> S $\cdots$ CuCl | -158.5(22.7)     | -131.7(4.5)       | -162.4(5.1)         | -142.8             |
| LiC <sub>4</sub> H <sub>4</sub> S $\cdots$ CuBr | -154.9(22.2)     | -129.3(4.4)       | -154.6(4.6)         | -139.2             |
| NaC <sub>4</sub> H <sub>4</sub> S $\cdots$ CuF  | -175.7(22.4)     | -146.3(4.5)       | -151.8(5.1)         | -166.0             |
| NaC <sub>4</sub> H <sub>4</sub> S $\cdots$ CuCl | -165.6(22.4)     | -143.5(4.4)       | -169.3(5.0)         | -157.4             |
| NaC <sub>4</sub> H <sub>4</sub> S $\cdots$ CuBr | -165.0(21.9)     | -141.4(4.3)       | -159.8(4.5)         | -154.0             |
| KC <sub>4</sub> H <sub>4</sub> S $\cdots$ CuF   | -188.2(22.8)     | -155.9(4.7)       | -156.4(5.1)         | -177.8             |
| KC <sub>4</sub> H <sub>4</sub> S $\cdots$ CuCl  | -178.9(23.0)     | -153.6(4.6)       | -138.9(5.1)         | -170.0             |
| KC <sub>4</sub> H <sub>4</sub> S $\cdots$ CuBr  | -176.0(22.7)     | -152.0(4.6)       | -162.4(4.6)         | -166.8             |

The values in parentheses are BSSE energies.

**Table S2 NBO bond orbital coefficients of  $\pi$ -type complexes**

| Complexs                                 | Orbital coefficients                                                                                             | d contribution(%) |
|------------------------------------------|------------------------------------------------------------------------------------------------------------------|-------------------|
| LiC <sub>4</sub> H <sub>4</sub> S...CuX  | No BD(C-Li)                                                                                                      | 0.00              |
| NaC <sub>4</sub> H <sub>4</sub> S...CuX  | No BD(C-Na)                                                                                                      | 0.00              |
| KC <sub>4</sub> H <sub>4</sub> S...CuX   | No BD(C-K)                                                                                                       | 0.00              |
| CaC <sub>4</sub> H <sub>4</sub> S...CuF  | BD(C-Ca)=0.9094C(8.05% <i>s</i> +91.80% <i>p</i> )+0.4160Ca(40.49% <i>s</i> + 14.64% <i>p</i> +44.86% <i>d</i> ) | 7.76              |
| CaC <sub>4</sub> H <sub>4</sub> S...CuCl | BD(C-Ca)=0.9083C(7.53% <i>s</i> +92.32% <i>p</i> )+0.4182Ca(40.75% <i>s</i> +14.93% <i>p</i> +44.31% <i>d</i> )  | 7.75              |
| CaC <sub>4</sub> H <sub>4</sub> S...CuBr | BD(C-Ca)=0.9081C(7.97% <i>s</i> +91.85% <i>p</i> )+0.4188Ca(40.86% <i>s</i> + 15.02% <i>p</i> +44.11% <i>d</i> ) | 7.74              |
| ScC <sub>4</sub> H <sub>4</sub> S...CuF  | BD(C2-Sc)=0.8272C(13.53% <i>s</i> +86.31% <i>p</i> )+0.5619Sc(21.38% <i>s</i> +3.48% <i>p</i> +75.11% <i>d</i> ) | 23.7              |
|                                          | BD(C3-Sc)=0.7519C(0.02% <i>s</i> +99.86% <i>p</i> )+0.6593Sc(4.47% <i>s</i> +2.86% <i>p</i> +92.65% <i>d</i> )   | 40.3              |
|                                          | BD(C2-Sc)=0.8282C(13.45% <i>s</i> +86.39% <i>p</i> )+                                                            | 24.2              |
| ScC <sub>4</sub> H <sub>4</sub> S...CuCl | 0.5604Sc(19.28% <i>s</i> +3.48% <i>p</i> +77.20% <i>d</i> )                                                      |                   |
|                                          | BD(C3-Sc)=0.7618C(0.01% <i>s</i> +99.87% <i>p</i> )+ 0.6478Sc(3.732% <i>s</i> +2.85% <i>p</i> +93.39% <i>d</i> ) | 39.2              |
|                                          | BD(C2-Sc)=0.8287C(13.46% <i>s</i> +86.38% <i>p</i> )+0.5597Sc(18.45% <i>s</i> +3.59% <i>p</i> +77.93% <i>d</i> ) | 24.4              |
| ScC <sub>4</sub> H <sub>4</sub> S...CuBr | BD(C3-Sc)=0.7652C(0.02% <i>s</i> +99.84% <i>p</i> )+0.6438Sc(3.49% <i>s</i> +2.91% <i>p</i> +93.59% <i>d</i> )   | 38.8              |

X=F, Cl, and Br

**Table S3** Topological properties at the BCP of Cu...S in  $\sigma$ -type C<sub>4</sub>H<sub>4</sub>S...CuX and MC<sub>4</sub>H<sub>4</sub>S...CuX (M = Li, Na, K, Ca, Sc; X = F, Cl, Br) (all values in a. u.)

| Complexes                                | $\rho(r_c)$ | $\nabla^2\rho(r_c)$ | $G_c$  | $V_c$   | $H_c$   | $-G_c/V_c$ | $\delta(\text{Cu, S})$ |
|------------------------------------------|-------------|---------------------|--------|---------|---------|------------|------------------------|
| C <sub>4</sub> H <sub>4</sub> S...CuF    | 0.0928      | 0.2577              | 0.0954 | -0.1264 | -0.0310 | 0.7547     | 0.7678                 |
| C <sub>4</sub> H <sub>4</sub> S...CuCl   | 0.0864      | 0.2326              | 0.0864 | -0.1147 | -0.0283 | 0.7533     | 0.7036                 |
| C <sub>4</sub> H <sub>4</sub> S...CuBr   | 0.0847      | 0.2247              | 0.0838 | -0.1114 | -0.0276 | 0.7522     | 0.6875                 |
| LiC <sub>4</sub> H <sub>4</sub> S...CuF  | 0.0949      | 0.2352              | 0.0939 | -0.1289 | -0.0350 | 0.7285     | 0.7889                 |
| LiC <sub>4</sub> H <sub>4</sub> S...CuCl | 0.0887      | 0.2130              | 0.0854 | -0.1175 | -0.0321 | 0.7268     | 0.7293                 |
| LiC <sub>4</sub> H <sub>4</sub> S...CuBr | 0.0873      | 0.2068              | 0.0832 | -0.1146 | -0.0314 | 0.7260     | 0.7166                 |
| NaC <sub>4</sub> H <sub>4</sub> S...CuF  | 0.0948      | 0.2356              | 0.0937 | -0.1285 | -0.0348 | 0.7292     | 0.7916                 |
| NaC <sub>4</sub> H <sub>4</sub> S...CuCl | 0.0890      | 0.2145              | 0.0857 | -0.1178 | -0.0321 | 0.7275     | 0.7353                 |
| NaC <sub>4</sub> H <sub>4</sub> S...CuBr | 0.0877      | 0.2086              | 0.0836 | -0.1151 | -0.0315 | 0.7263     | 0.7225                 |
| KC <sub>4</sub> H <sub>4</sub> S...CuF   | 0.0952      | 0.2383              | 0.0944 | -0.1293 | -0.0349 | 0.7301     | 0.7991                 |
| KC <sub>4</sub> H <sub>4</sub> S...CuCl  | 0.0896      | 0.2169              | 0.0864 | -0.1187 | -0.0323 | 0.7279     | 0.7422                 |
| KC <sub>4</sub> H <sub>4</sub> S...CuBr  | 0.0882      | 0.2108              | 0.0843 | -0.1159 | -0.0316 | 0.7274     | 0.7295                 |
| CaC <sub>4</sub> H <sub>4</sub> S...CuF  | 0.0968      | 0.2477              | 0.0971 | -0.1322 | -0.0351 | 0.7345     | 0.8193                 |
| CaC <sub>4</sub> H <sub>4</sub> S...CuCl | 0.0915      | 0.2275              | 0.0895 | -0.1220 | -0.0325 | 0.7336     | 0.7652                 |
| CaC <sub>4</sub> H <sub>4</sub> S...CuBr | 0.0901      | 0.2212              | 0.0873 | -0.1192 | -0.0319 | 0.7324     | 0.7520                 |
| ScC <sub>4</sub> H <sub>4</sub> S...CuF  | 0.0964      | 0.2515              | 0.0979 | -0.1330 | -0.0351 | 0.7361     | 0.8049                 |
| ScC <sub>4</sub> H <sub>4</sub> S...CuCl | 0.0904      | 0.2293              | 0.0895 | -0.1218 | -0.0323 | 0.7348     | 0.7465                 |
| ScC <sub>4</sub> H <sub>4</sub> S...CuBr | 0.0890      | 0.2234              | 0.0874 | -0.1189 | -0.0315 | 0.7351     | 0.7333                 |

**Table S4 Atomic net charge on different regions of  $\sigma$ -type  $C_4H_4S \cdots CuX$  and  $MC_4H_4S \cdots CuX$  (M = Li, Na, K, Ca, Sc; X = F, Cl, Br)**

|                         | M      | Cu     | X       | CuX     | thiophene |
|-------------------------|--------|--------|---------|---------|-----------|
| $C_4H_4S \cdots CuF$    |        | 0.6182 | -0.7508 | -0.1326 | 0.1326    |
| $C_4H_4S \cdots CuCl$   |        | 0.5189 | -0.6549 | -0.1360 | 0.1360    |
| $C_4H_4S \cdots CuBr$   |        | 0.4686 | -0.6044 | -0.1358 | 0.1358    |
| $LiC_4H_4S \cdots CuF$  | 0.9665 | 0.5745 | -0.7559 | -0.1814 | -0.7851   |
| $LiC_4H_4S \cdots CuCl$ | 0.8075 | 0.4845 | -0.6696 | -0.1851 | -0.6224   |
| $LiC_4H_4S \cdots CuBr$ | 0.9601 | 0.4347 | -0.6210 | -0.1863 | -0.7738   |
| $NaC_4H_4S \cdots CuF$  | 0.8944 | 0.5683 | -0.7593 | -0.1910 | -0.7034   |
| $NaC_4H_4S \cdots CuCl$ | 0.8950 | 0.4810 | -0.6761 | -0.1951 | -0.6999   |
| $NaC_4H_4S \cdots CuBr$ | 0.8951 | 0.4324 | -0.6289 | -0.1965 | -0.6986   |
| $KC_4H_4S \cdots CuF$   | 0.8824 | 0.5656 | -0.7614 | -0.1958 | -0.6866   |
| $KC_4H_4S \cdots CuCl$  | 0.8839 | 0.4799 | -0.6797 | -0.1998 | -0.6841   |
| $KC_4H_4S \cdots CuBr$  | 0.8839 | 0.4319 | -0.6332 | -0.2013 | -0.6826   |
| $CaC_4H_4S \cdots CuF$  | 1.3986 | 0.5614 | -0.7630 | -0.2016 | -1.1970   |
| $CaC_4H_4S \cdots CuCl$ | 1.4030 | 0.4768 | -0.6832 | -0.2064 | -1.1966   |
| $CaC_4H_4S \cdots CuBr$ | 1.4066 | 0.4293 | -0.6379 | -0.2086 | -1.1980   |
| $ScC_4H_4S \cdots CuF$  | 1.2985 | 0.5740 | -0.7587 | -0.1847 | -1.1138   |
| $ScC_4H_4S \cdots CuCl$ | 1.3036 | 0.4873 | -0.6752 | -0.1879 | -1.1157   |
| $ScC_4H_4S \cdots CuBr$ | 1.3043 | 0.4392 | -0.6277 | -0.1885 | -1.1158   |

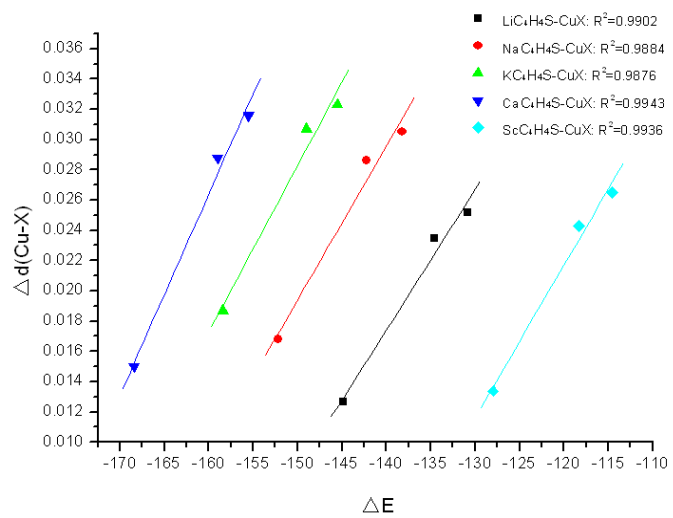

Figure S1 Linear relationships between interaction energy( $\Delta E$ ) and the bond lengths changes of Cu $\cdots$ X ( $\Delta d(\text{Cu-X})$ ) in  $\sigma$ -type  $\text{C}_4\text{H}_4\text{S}\cdots\text{CuX}$ .

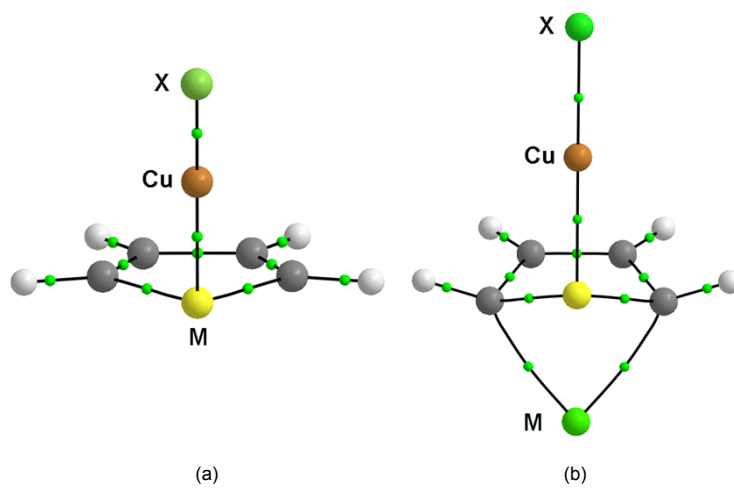

Figure S2 Molecule graphs of electron density of  $\sigma$ -type  $C_4H_4S \cdots CuX$ (a) and  $MC_4H_4S \cdots CuX$ (b) ( $M = Li, Na, K, Ca, Sc$ ;  $X = F, Cl, Br$ ).

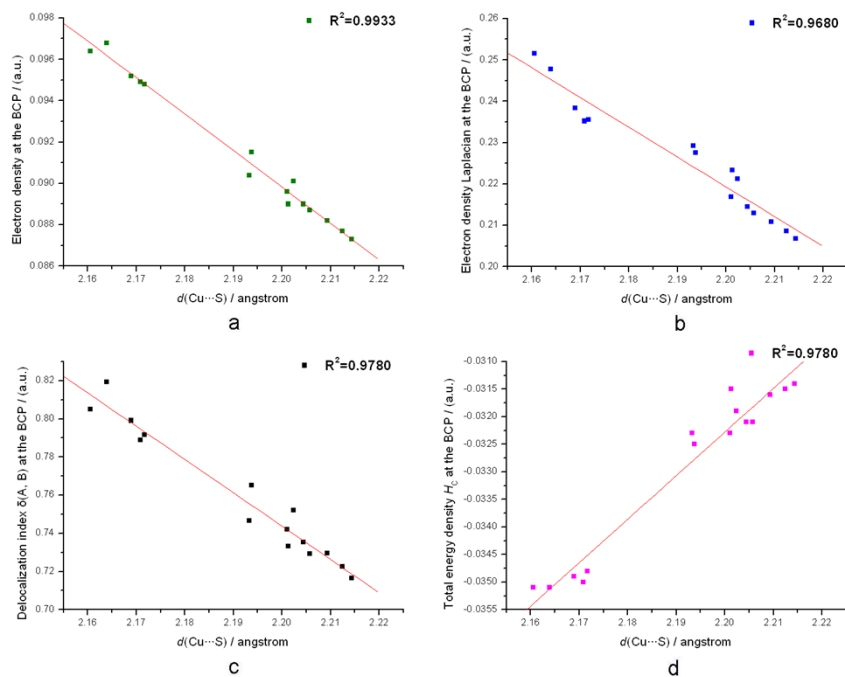

Figure S3 Linear relationships between topological properties at the BCPs and the bond lengths  $d(\text{Cu}\cdots\text{S})$  of  $\text{Cu}\cdots\text{S}$  bonding in  $\sigma$ -type  $\text{MC}_4\text{H}_4\text{S}\cdots\text{CuX}$  ( $M = \text{Li, Na, K, Ca, Sc}$ ;  $X = \text{F, Cl, Br}$ ). (a) Electron density  $\rho(r_c)$  and the bond lengths, (b) Electron density Laplacian  $\nabla^2\rho(r_c)$  and the bond lengths, (c) Delocalization index  $\delta(A, B)$  and the bond lengths, (d) Total energy density  $H_c$  and the bond lengths.

#### Relationship between the topological parameters and $\text{Cu}\cdots\text{S}$ bond lengths

$$\rho(r_c) = 0.4778 - 0.1764 \times d(\text{Cu}\cdots\text{S})$$

$$\nabla^2\rho(r_c) = 1.8043 - 0.7205 \times d(\text{Cu}\cdots\text{S})$$

$$\delta(A, B) = 4.5825 - 1.7449 \times d(\text{Cu}\cdots\text{S})$$

$$H_c = -0.2062 + 0.0791 \times d(\text{Cu}\cdots\text{S})$$



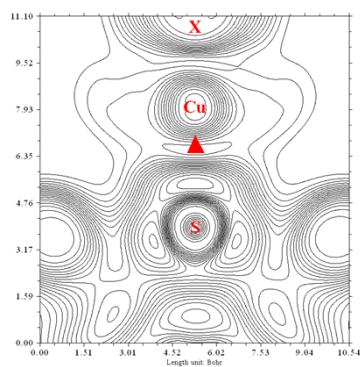

Figure S4 Two-dimensional (2D) cross sections ELF through the  $\sigma$ -type  $MC_4H_4S \cdots CuX$  ( $M = Li, Na, K, Ca, Sc$ ;  $X = F, Cl, Br$ ).

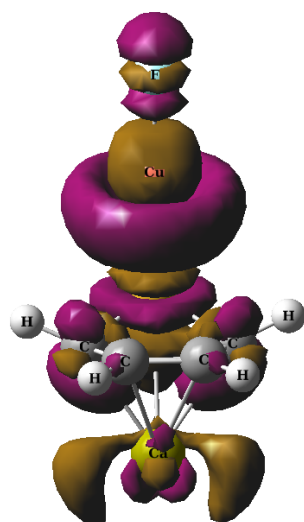

Figure S5 The molecular formation density difference of  $\sigma$ -type  $MC_4H_4S \cdots CuX$  (brown is negative, purple is positive and the isosurface is 0.001).
